# Supplementary material for: Can phylogeny predict chemical diversity and potential medicinal activity of plants? A case study of amaryllidaceae
Source: PubMed Central journal article supplement (PMC3499480; doi:10.1186/1471-2148-12-182), 2012-09-14

Figure S1.  
Total Evidence – Bayesian consensus

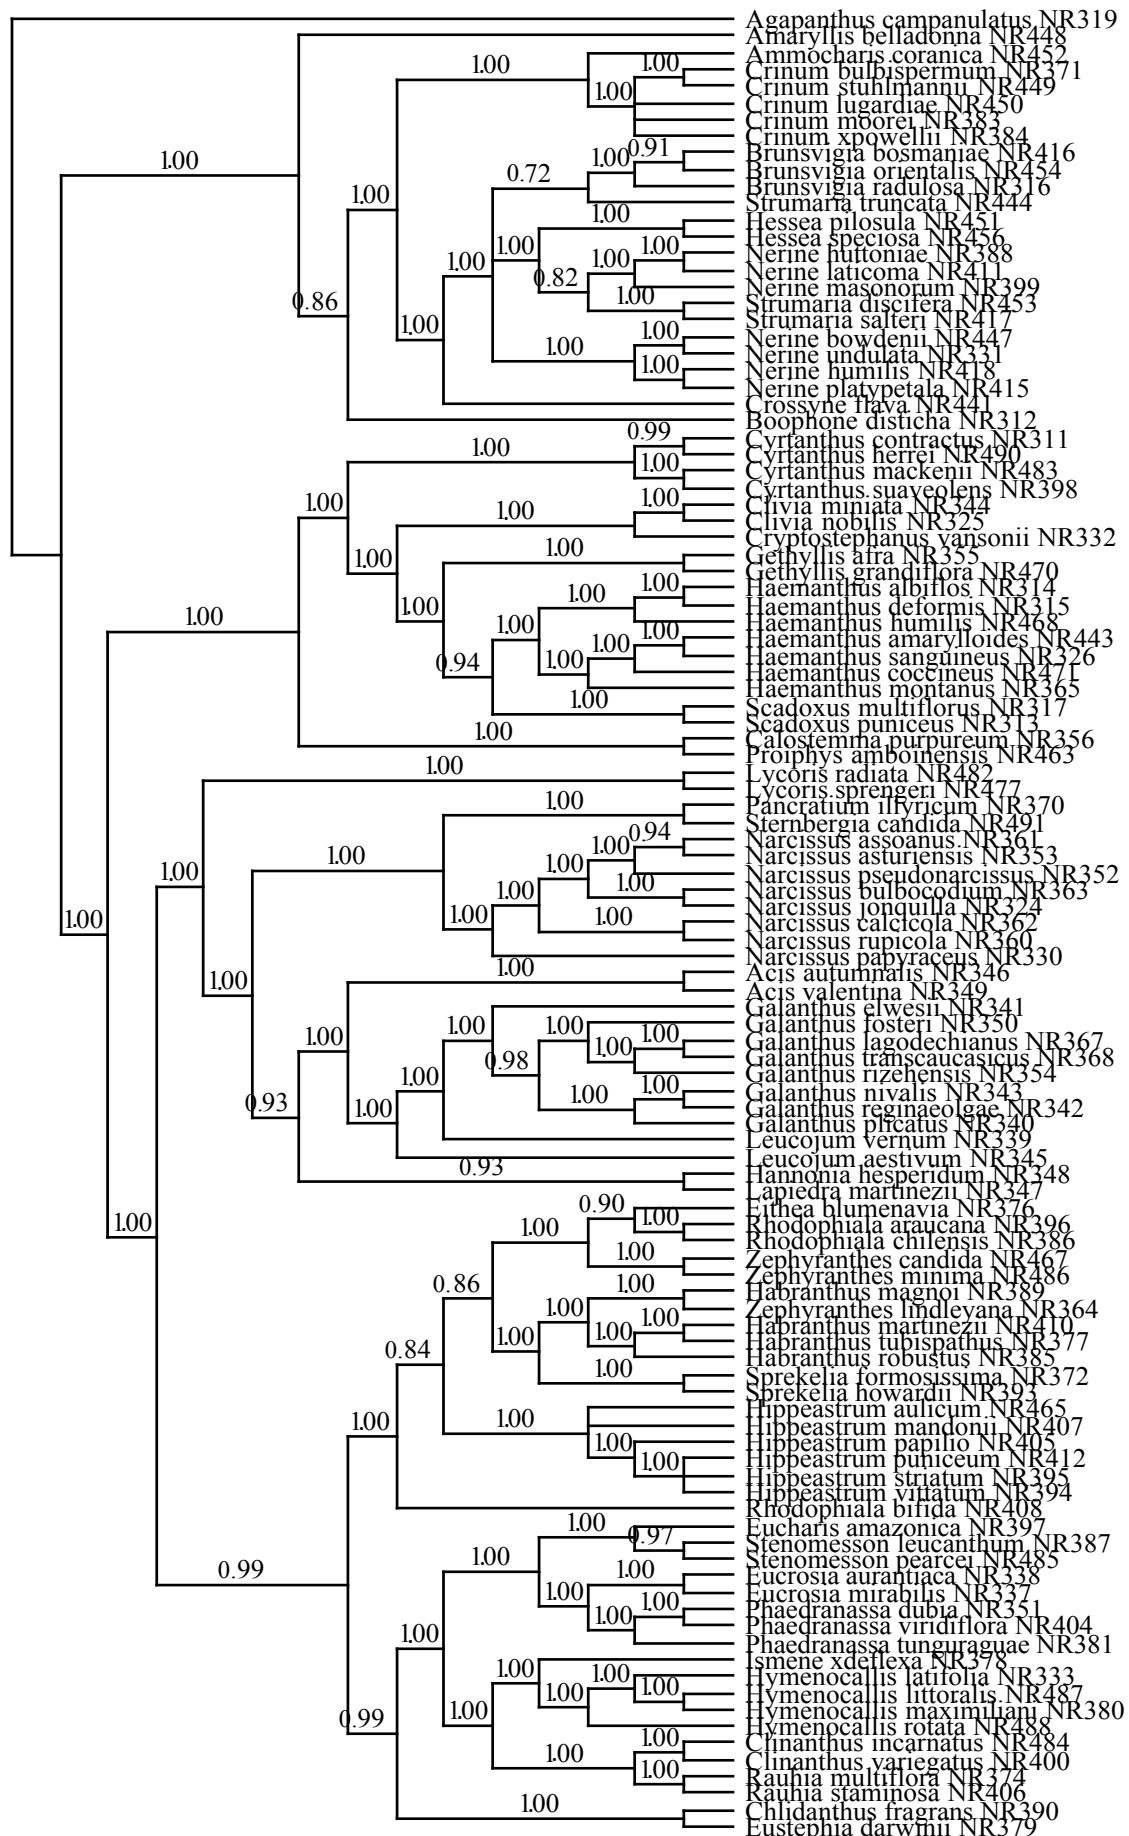

Figure S2.

Total Evidence - MP Bootstrap

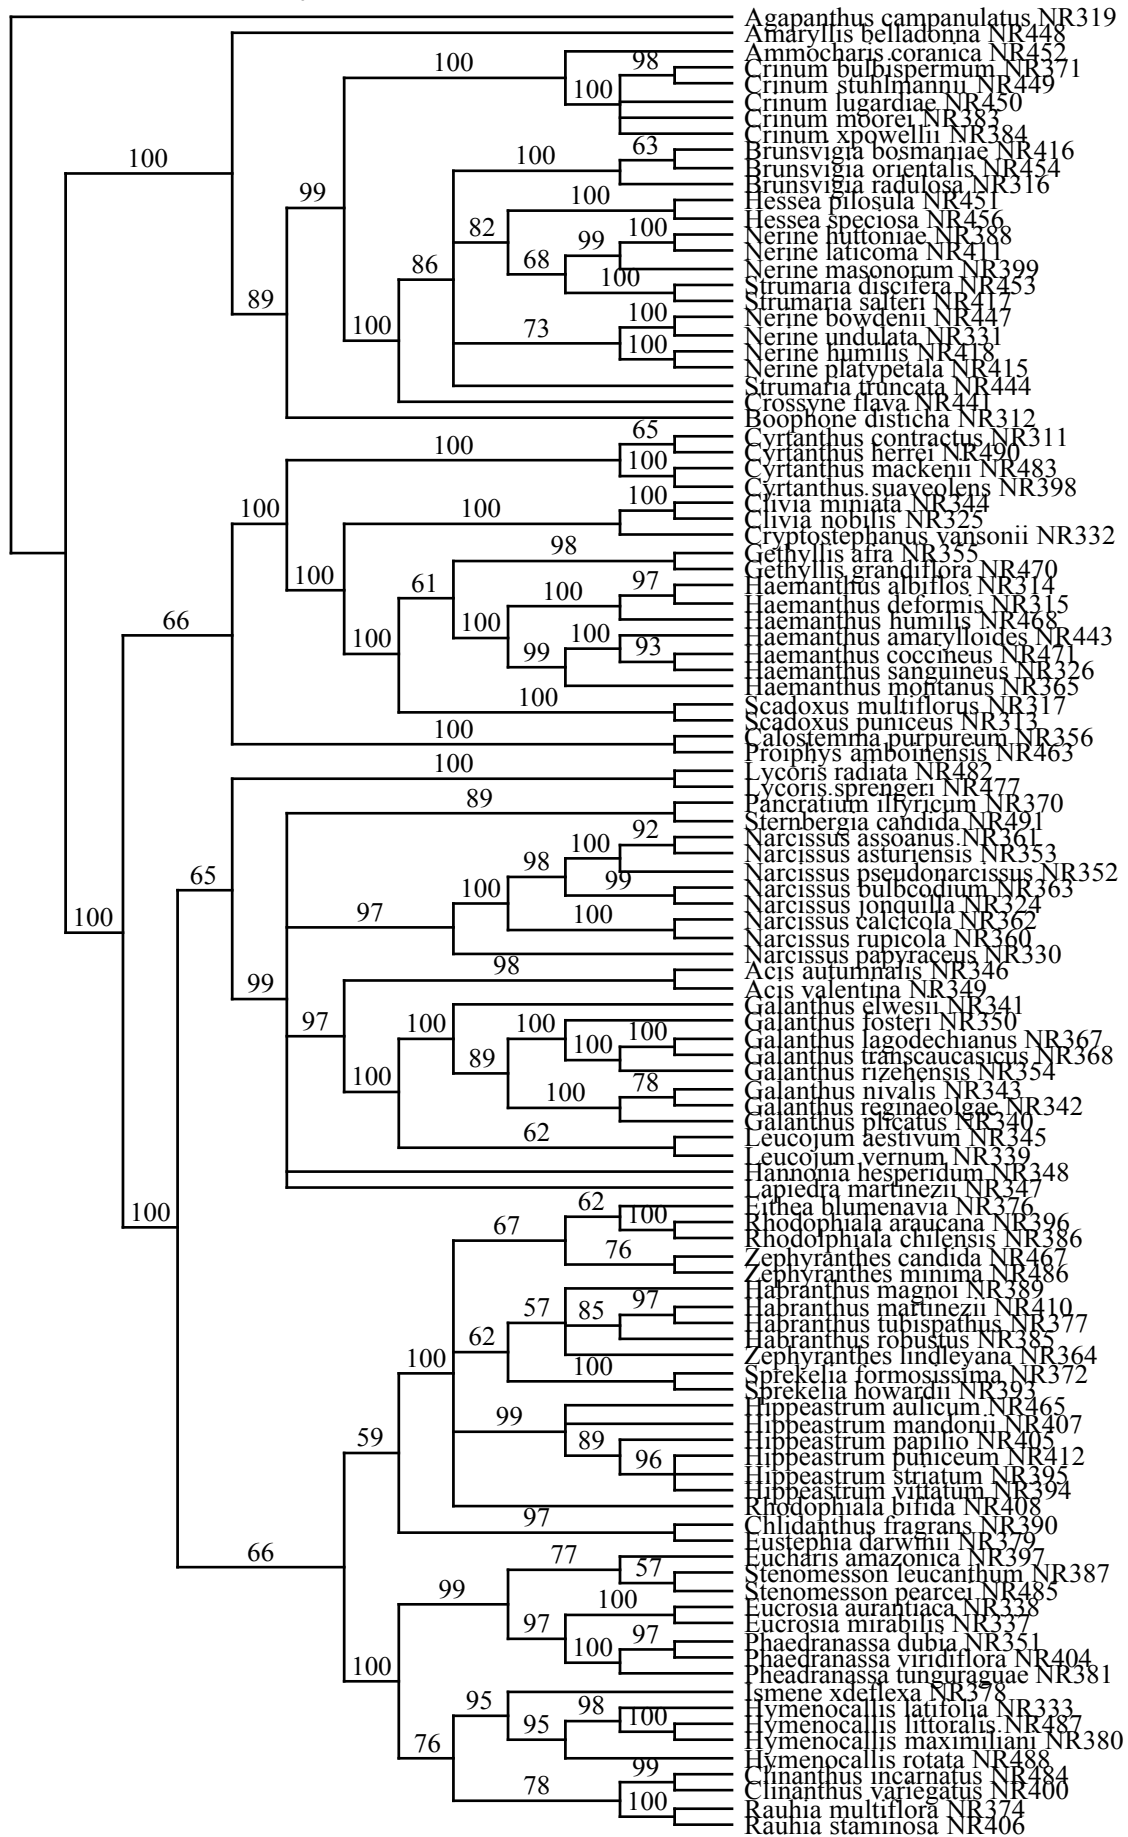

Figure S3.  
ITS - MP Bootstrap

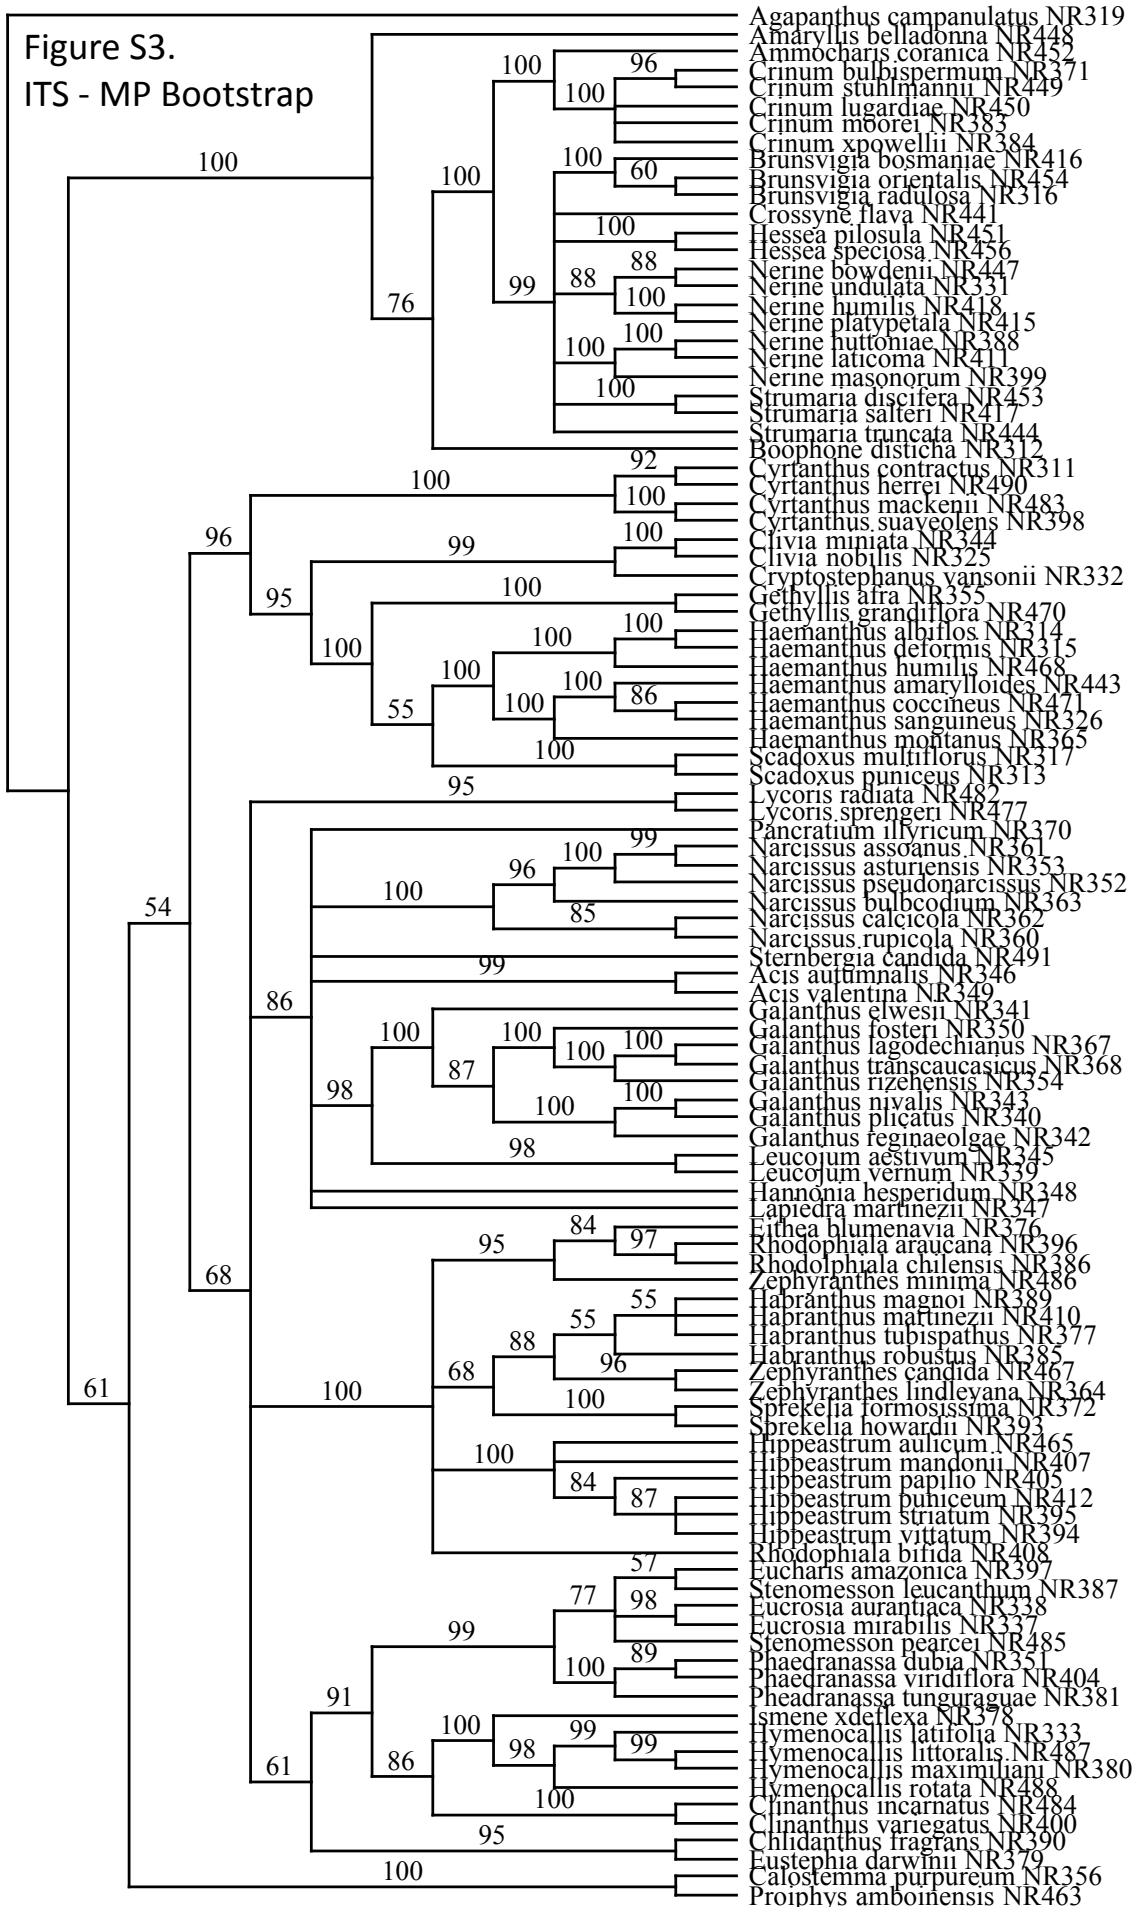

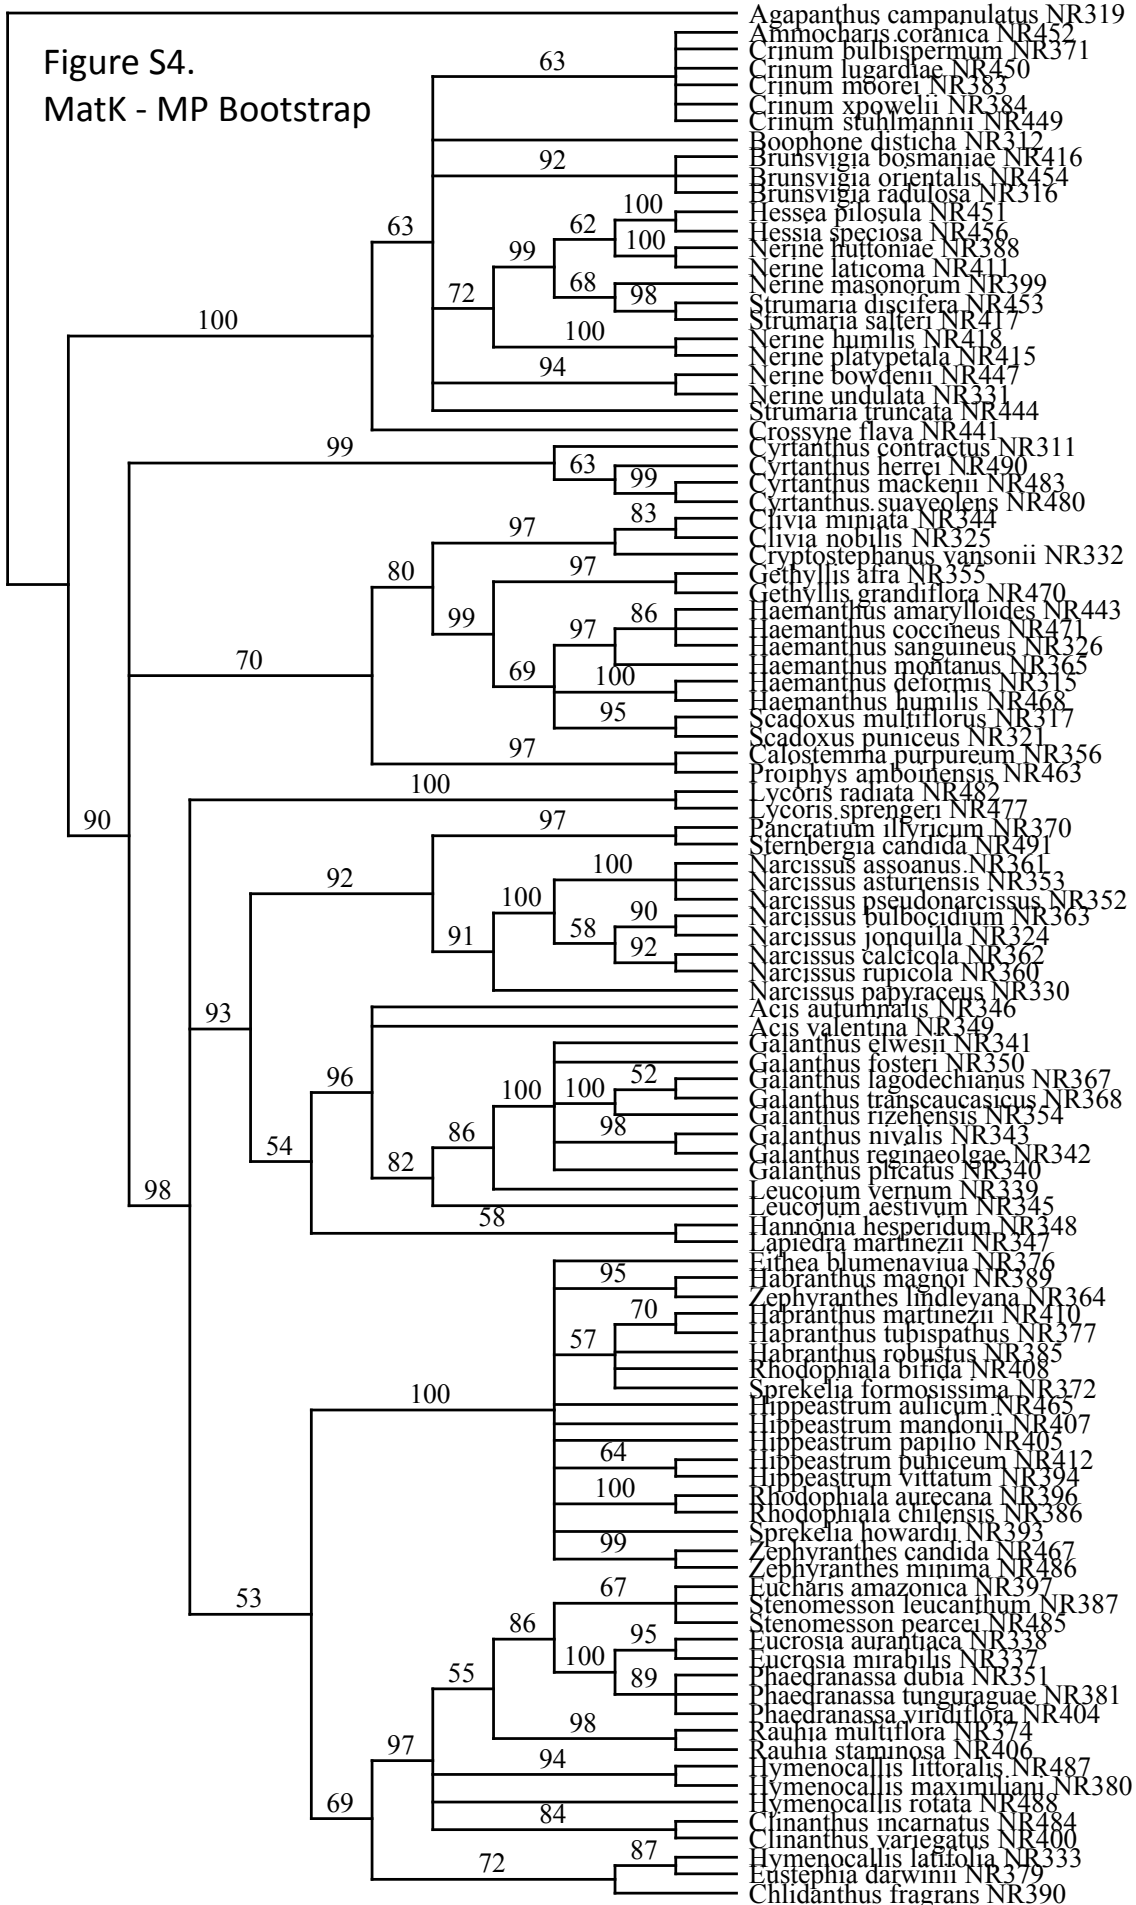

Figure S5.  
TrnLF - MP Bootstrap

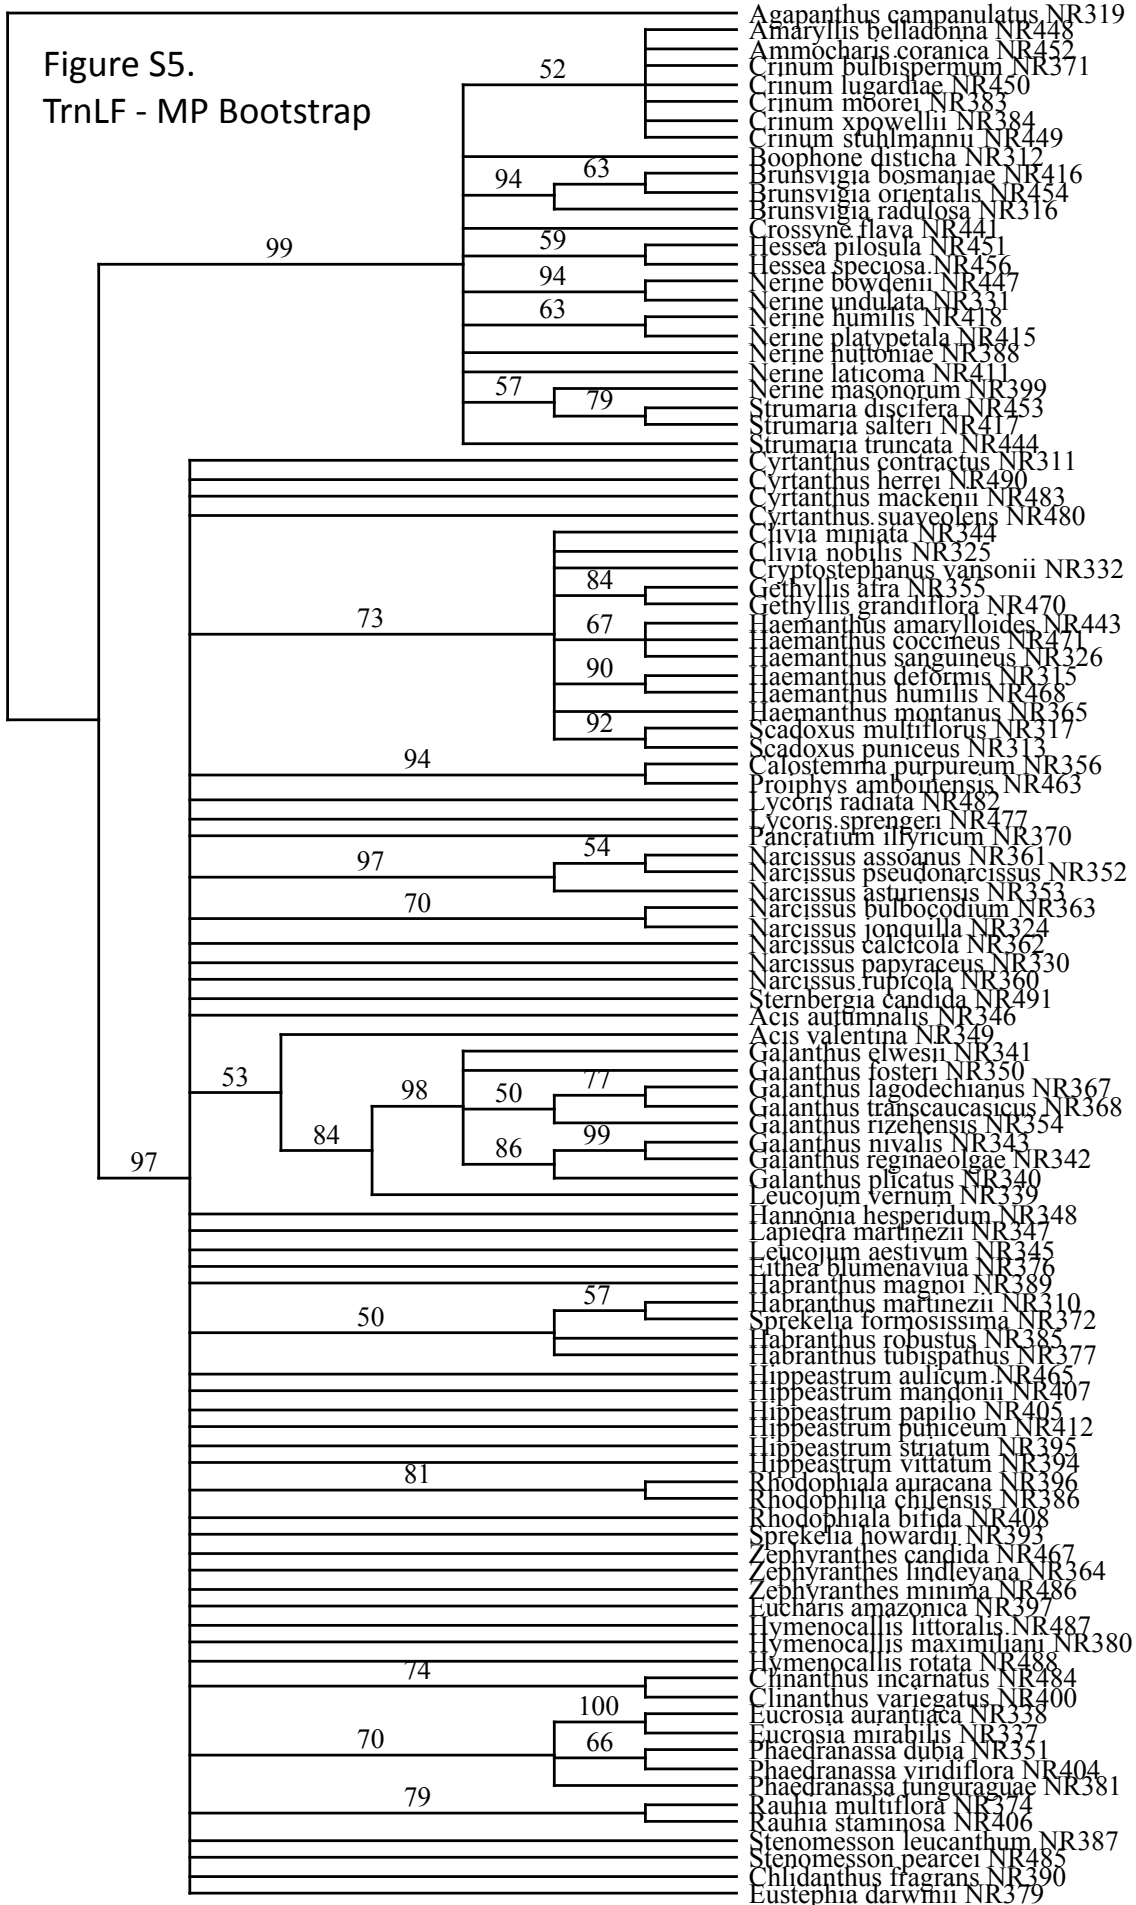

Figure S6.  
Plastid combined  
- MP Bootstrap

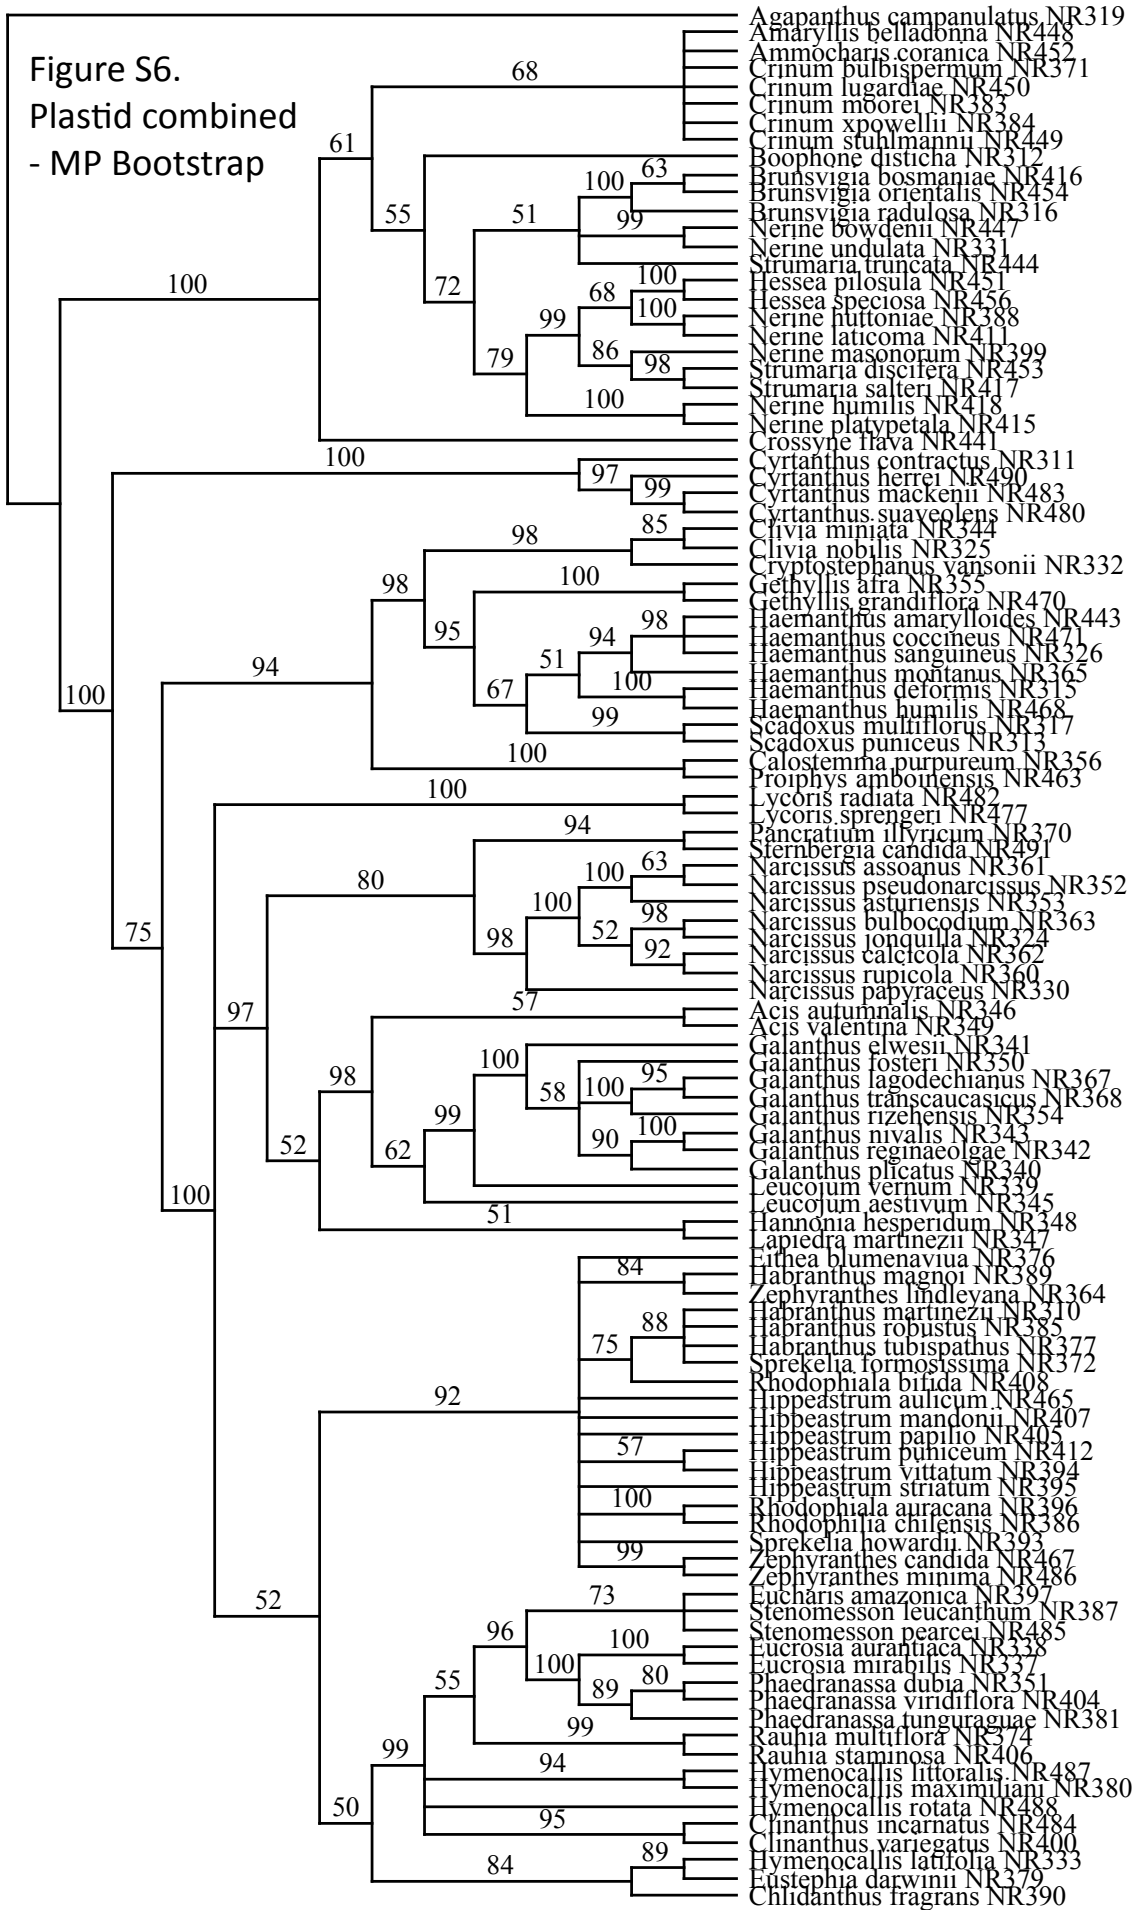

Figure S7.  
Nad1 - MP Bootstrap

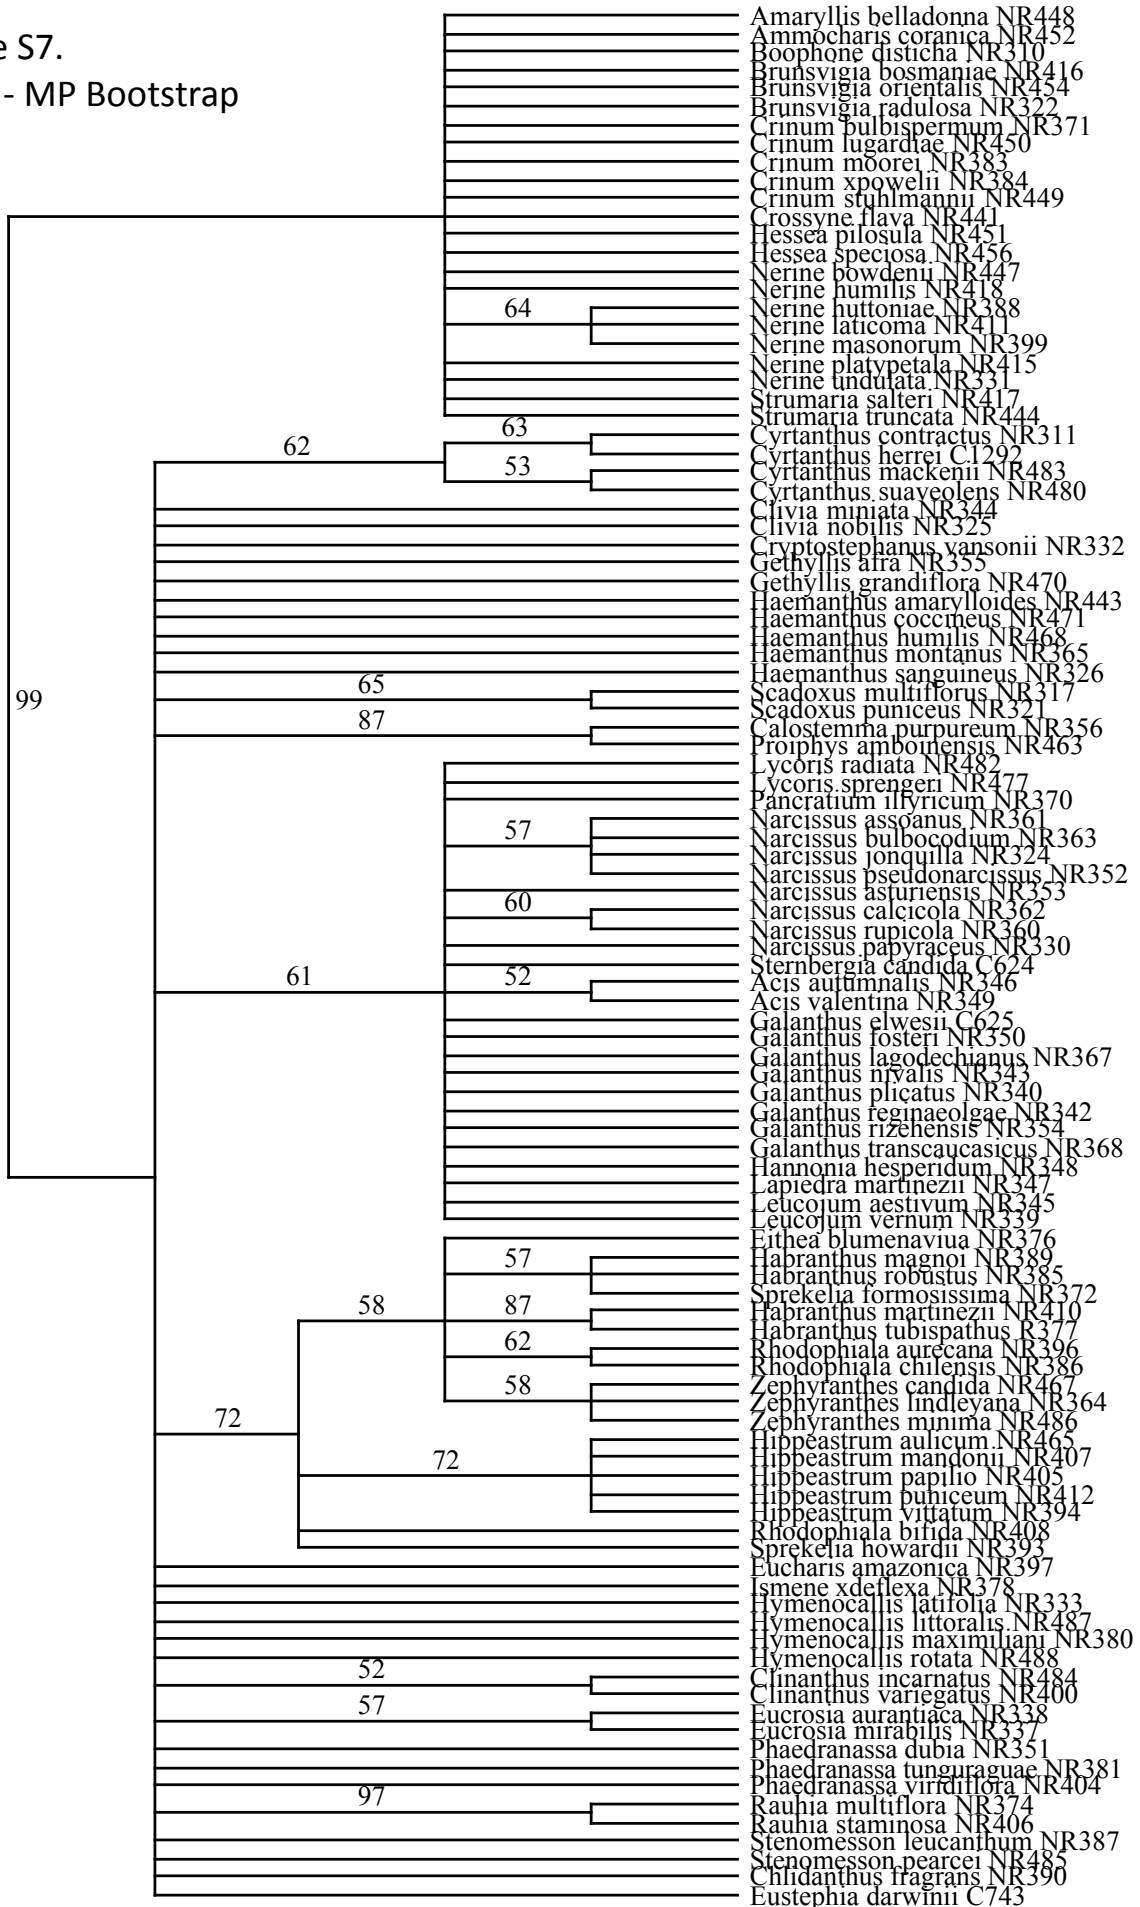

Supplement: 1471-2148-12-182-S1.pdf [file 1471-2148-12-182-S1.pdf]
