# Supplementary material for: Can phylogeny predict chemical diversity and potential medicinal activity of plants? A case study of amaryllidaceae
Source: PubMed Central journal article supplement (PMC3499480; doi:10.1186/1471-2148-12-182), 2012-09-14
Supplement: 1471-2148-12-182-S3.pdf [file 1471-2148-12-182-S3.pdf]

**Additional file 3. Primers used in this study for amplification and sequencing of four DNA regions in Amaryllidaceae subfamily Amaryllidoideae.**

| Region       | Primer             | Sequence 5'-3'                 | Direction | Reference                     |
|--------------|--------------------|--------------------------------|-----------|-------------------------------|
| ITS          | ITS5               | GGA AGT AAA AGT CGT AAC AAG G  | Forward   | White <i>et al.</i> (1999)    |
|              | ITS4               | TCC TCC GCT TAT TGA TAT GC     | Reverse   | White <i>et al.</i> (1999)    |
|              | ITS1 <sup>1</sup>  | TCC GTA GGT GAA CCT GCG G      | Forward   | White <i>et al.</i> (1999)    |
|              | ITS2 <sup>1</sup>  | GCT GCG TTC TTC ATC GAT GC     | Reverse   | White <i>et al.</i> (1999)    |
| <i>trnLF</i> | trnC               | CGA AAT CGG TAG ACG CTA CG     | Forward   | Taberlet <i>et al.</i> (1991) |
|              | trnF               | ATT TGA ACT GGT GAC ACG AG     | Reverse   | Taberlet <i>et al.</i> (1991) |
| <i>matK</i>  | 19F                | CGT TCT GAC CAT ATT GCA CTA TG | Forward   | Kores <i>et al.</i> (2000)    |
|              | 2R                 | AAC TAG TCG GAT GGA GTA G      | Reverse   | Johnson & Soltis (1996)       |
|              | 1326R <sup>1</sup> | TCT AGC ACA CGA AAG TCG AAG T  | Reverse   | Sun <i>et al.</i> (2001)      |
|              | KatF <sup>1</sup>  | ATC GGG CCA TCC TAT TAG        | Forward   | Larsen <i>et al.</i> (2010)   |
| <i>nad1</i>  | nad1eB             | GCA TTA CGA TCT GCA GCT CA     | Forward   | Demesure <i>et al.</i> (1995) |

|  |                       |                               |         |                                 |
|--|-----------------------|-------------------------------|---------|---------------------------------|
|  | nad1eCR               | GGA GCT CGA TTA GTT TCT GC    | Reverse | Demesure <i>et al.</i> (1995)   |
|  | nad1iB2 <sup>1</sup>  | GTC GAG CAT ACG ACG ATG CCG C | Forward | Cuenca <i>et al.</i> (in press) |
|  | nad1iB2R <sup>1</sup> | GGC GGC ATC GTC GTA TGC TCG   | Reverse | Cuenca <i>et al.</i> (in press) |

<sup>1</sup>Primarily used for sequencing.

**Cuenca A, Petersen G, Seberg O. 2012.** Genes and processed paralogs coexist in plant mitochondria. *Journal of Molecular Evolution* (in press).

**Demesure B, Sodzi N, Petit RJ. 1995.** A set of universal primers for amplification of polymorphic non-coding regions of mitochondrial and chloroplast DNA in plants. *Molecular Ecology* **4**: 129-134.

**Johnson LA, Soltis DE. 1995.** *matK* DNA sequences and phylogenetic reconstruction in Saxifragaceae s.s. *Systematic Botany* **75**: 753-766.

**Kores PJ, Weston PH, Molvray M, Chase MW. 2000.** Phylogenetic relationships within the Diurideae (Orhidaceae): inferences from plastid *matK* DNA sequences. In: Wilson KL, Morrison, DA, eds. *Monocots: Systematics and Evolution*. CSIRO Publishing, Collingwood, Victoria, Australia, pp. 449–456.

- Larsen MM, Adersen AA, Davis AP, Lledó MD, Jäger AK, Rønsted N. 2010.** Using a phylogenetic approach to selection of target plants in drug discovery of acetylcholinesterase inhibiting alkaloids in Amaryllidaceae tribe Galantheae. *Biochemical Systematics and Ecology* **38**: 1026-1034.
- Sun H, McLewin W, Fay MF. 2001.** Molecular phylogeny of *Helleborus* (Ranunculaceae), with an emphasis on the east Asian-Mediterranean disjunction. *Taxon* **50**: 1001-1018.
- Taberlet P, Gielly L, Pautou G, Bouvet J. 1991.** Universal primers for amplification of three non-coding regions of chloroplast DNA. *Plant Molecular Biology* **17**: 1105–1109.
- White TJ, Bruns T, Lee S, Taylor J. 1990.** Amplification and direct sequencing of fungal ribosomal RNA genes for phylogenetics. In: Innis MA, Gelfand DH, Sninsky JJ, White TJ, eds. *PCR Protocols*. Academic Press, San Diego, California, USA, pp. 315-322.
